# Supplementary material
Source: PubMed Central journal article supplement (PMC8899823)
Supplement: NIHMS1779638-supplement-Supplementary_Figures_and_Tables.pdf [file NIHMS1779638-supplement-Supplementary_Figures_and_Tables.pdf]

1 **Supplemental Figure Legends**

2

3 **Figure S1. The neutralization activity of DH1047, ADG-2, and REGN 10933 against**  
4 **sarbecoviruses.** Neutralization is shown for SARS-CoV-2 B.1.351, SARS-CoV urbani, and  
5 RsSHC014. Data are representative of two technical replicates.

6

7 **Figure S2. The binding activity of cross-reactive antibodies against MERS-CoV and human**  
8 **common-cold coronaviruses.** The binding activity of four broadly neutralizing antibodies  
9 against SARS-CoV-2 NTD, MERS-CoV spike protein, HCoV-OC43 spike protein, HCoV-NL63  
10 spike protein, and HCoV-229E spike protein is shown for DH1235, DH1073, DH1046, and  
11 DH1047. Data are representative of two technical replicates. OD, optical density.

12

13 **Figure S3. Coronavirus cross-reactive antibodies exhibit distinct binding modes to SARS-**  
14 **CoV-2 receptor binding domain (RBD).** (A) Three-dimensional reconstruction from negative  
15 stain electron microscopic images of DH1073 (purple) in complex with Hexapro stabilized  
16 SARS-CoV-2 Spike ectodomain (gray). On the left and center, the map is shown in two  
17 orthogonal views. On the right, the map is shown as a transparent surface, rigidly fit with a 1-  
18 RBD-up spike model, PDB ID: 6ACK. (B) Three-dimensional reconstruction of DH1235 (blue)  
19 in complex with Hexapro stabilized Spike ectodomain (gray). The rigidly fit 3-RBD-up spike  
20 model on the right was generated from PDB ID: 6ACK. Fit models in (A) and (B) were used to  
21 compare the binding of DH1073 and DH1235 to known RBD-directed nAbs. (C) Four  
22 orthogonal views of RBD binding by DH1073 (purple) and DH1235 (blue), compared to known  
23 RBD nAbs, shown as molecular surface: C105 (pale cyan, Class 1, PDG ID 6XCN and 6XCA),

24 DH1041 (light blue, Class 2, PDB ID: 7LAA), S309 (wheat, Class 3, PDB ID: 7BEP), CR3022  
25 (pink, Class 4, PDB ID: 6W41), and DH1047 (green, PDB ID: 7LD1). The last two views  
26 correspond to the same views shown in Fig. 3D. DH1073 overlaps with DH1235, C105 (Class  
27 1) and CR3022 (Class 4). DH1235 overlaps DH1073, DH1047, C105 and CR3022. **(D)**  
28 Antibody competition for binding to SARS-CoV-2 spike protein stabilized with two prolines (S-  
29 2P) is shown by results from surface plasmon resonance (SPR) assays. The antibody used to  
30 capture S-2P is shown as the row title. The antibody flowed over the captured spike is shown as  
31 column titles. + indicates blocking and competition; - indicates no blocking of binding and no  
32 competition.

33

34 **Figure S4. Negative Stain Electron Microscopy (NSEM) of DH1047 bound to bat**

35 **RsSHC014 and SARS-CoV spike ectodomains.** (A) Representative 2D class averages of bat  
36 RsSHC014 S-2P ectodomain bound to DH1047 Fab are shown. (B) An overlay of 3D  
37 reconstructions of DH1047 bound to bat RsSHC014 2P (gray) and SARS-CoV-2 HexaPro  
38 (purple) spike ectodomains is shown. (C) Representative 2D class averages of SARS-CoV S-2P  
39 ectodomain bound to DH1047 Fab are shown. (D) An overlay of 3D reconstruction of DH1047  
40 bound to bat SARS-CoV 2P (gray) and SARS-CoV-2 HexaPro (purple) spike ectodomains is  
41 shown. The red boxes in (A) and (C) indicate the classes that show DH1047 Fab bound to spike.

42

43 **Figure S5. Cryo-EM data processing for the SARS-CoV spike ectodomain bound to**

44 **DH1047.** (A) A representative cryo-EM micrograph is shown. (B) Cryo-EM contrast transfer  
45 function (CTF) fit is shown. (C) Representative 2D class averages from Cryo-EM dataset are  
46 shown. (D and E) Ab initio reconstruction (D) and a refined map (E) are shown. (F) Fourier

47 shell correlation curves are shown. **(G)** A refined cryo-EM map colored by local resolution is  
48 shown. **(H)** Zoom-in images show the SD1, NTD, HR1/CH and RBD/Fab contact regions in the  
49 structure. The cryo-EM map is shown as a blue mesh and the fitted model is in cartoon  
50 representation, with residues shown as sticks.

51

52 **Figure S6. The affinity data of DH1047 against SARS-CoV and RsSHC014 spikes. SPR**  
53 binding experiments of DH1047 against SARS-CoV-2 Toronto and RsSHC014. Binding affinity  
54 measurements are shown in the tables and response units (RU) as a function of time in seconds  
55 (s) is shown for both SARS-CoV and RsSHC014. SPR experiments were repeated twice.

56

57 **Figure S7. Hematoxylin and eosin staining of lungs from SARS-CoV infected mice collected**  
58 **at 4 days post infection.**

59 **(A to D)** mice were treated with control CH65 antibody prophylactically **(A)** or therapeutically  
60 **(B)** or treated with DH1047 antibody prophylactically **(C)** or therapeutically **(D)**. Prophylactic  
61 treatment was administered 12 hours before infection, and therapeutic treatment was  
62 administered 12 hours after infection. Pathologic features of acute lung injury were scored using  
63 two separate tools: the American Thoracic Society Lung Injury Scoring (ATS ALI) system.  
64 Using this ATS ALI system, we created an aggregate score for the following features:  
65 neutrophils in the alveolar and interstitial space, hyaline membranes, proteinaceous debris filling  
66 the air spaces, and alveolar septal thickening. Three randomly chosen high power ( $\times 60$ ) fields of  
67 diseased lung were assessed per mouse. Representative images are shown. All images were taken  
68 at the same magnification. The black bar indicates 100  $\mu$ m scale.

69

70 **Figure S8. Comparison of DH1047 binding footprint to that of other RBD-directed Abs**  
71 **that bind overlapping epitopes.**

72 (A) RBD is shown in black and ACE2 binding footprint is colored yellow. Binding footprints of  
73 antibodies DH1047 (PDB: 7LD1), CR3022 (PDB: 6YLA), EY6A (PDB: 6ZCZ), H014 (PDB:  
74 7CAH), COVA1-16 (PDB: 7JMW) and S304 (PDB: 7JW0) are shown in green. (B) The overlay  
75 shows DH1047 bound RBD and RBD bound to nanobodies VHH V (PDB: 7KN6), VHH W  
76 (PDB: 7KN7) and VHH-72 (PDB: 6WAQ).

77 **Figure S9. Binding of DH1047 mutants to the SARS-CoV-2 S-2P ectodomain.**

78 (A) Binding assays were performed by Biolayer Interferometry using alanine scanning mutants  
79 of DH1047. (Top) Interferometry curves are shown. (Bottom) Binding of DH1047 IgG and mutants  
80 to SARS-CoV-2 S-2P ectodomain was normalized to the binding observed for DH1047 WT IgG  
81 (dotted line). (B) Binding of purified DH1047 WT IgG and selected mutants to SARS-CoV-2 S-  
82 2P ectodomain was measured by SPR. The spike was captured by its C-terminal TwinStreptactin  
83 tag on a SA chip. Binding to the antibodies was measured by flowing over 200 nM solutions of  
84 the IgG in HBS-EP+ buffer. (C) The binding interface of DH1047 to RBD (gray) is shown. The  
85 DH1047 residues that were mutated are shown as sticks and labeled.

86

87 **Figure S10. DH1047 and ADG-2 bind the RBD of SARS-CoV and SARS-CoV-2 spike**  
88 **ectodomains using a similar footprint.**

89 (A) A cartoon representation is shown for DH1047 (colored in pale green) bound to the RBD  
90 (gray surface, ACE2 binding site in yellow) of SARS-CoV spike ectodomain and for ADG-2  
91 (cyan) bound to SARS-CoV-2 spike ectodomain. The homologous Fab ADI-19425 (PDB 6APC)

92 was docked in the ADG-2 cryo-EM map (EMD-23160) to generate the model. **(B)** DH1047 and  
93 ADG-2 bind partially overlapping binding sites on the RBD. **(C)** The therapeutic activity of  
94 DH1047, ADG-2, and control mAb in aged mice infected with SARS-CoV-2 B.1.351 was  
95 measured. Animals were treated at 6 hours post infection with the indicated antibodies and  
96 monitored for percent of starting weight (left) as well as lung viral replication titers (middle), and  
97 lung pathology (right) at 4 days post infection. Data are presented as mean±SEM (weight) or as  
98 mean (lung viral titer and lung pathology). Change in weight was compared using a two-way  
99 ANOVA followed by Tukey's multiple comparisons test, and differences in lung viral load and  
100 pathology were evaluated using a one-way ANOVA followed by Dunnett's multiple  
101 comparisons test. Differences in survival were measured by a Mantel-Cox test. \*p<0.05;  
102 \*\*p<0.01; \*\*\*p<0.001.

103

104

105

106

107

108

109

110

111 **Table S1. Monoclonal antibody neutralization screen against SARS-CoV-2 2AA MA,**  
112 **SARS-CoV, WIV-1, and RsSHC014**

113

114 **Table S2. Cryo-EM data collection and refinements statistics.**

115

116 **Table S3. Immunogenetic characteristics of broadly cross-reactive mAbs.**

117

Figure S1

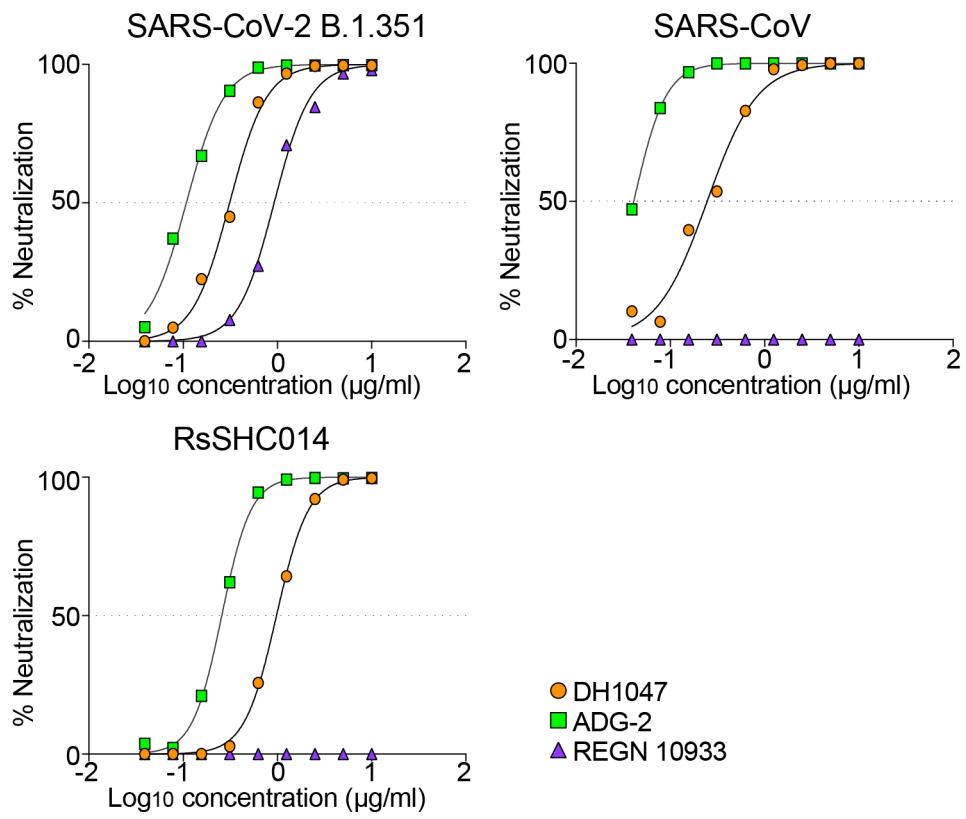

Figure S2

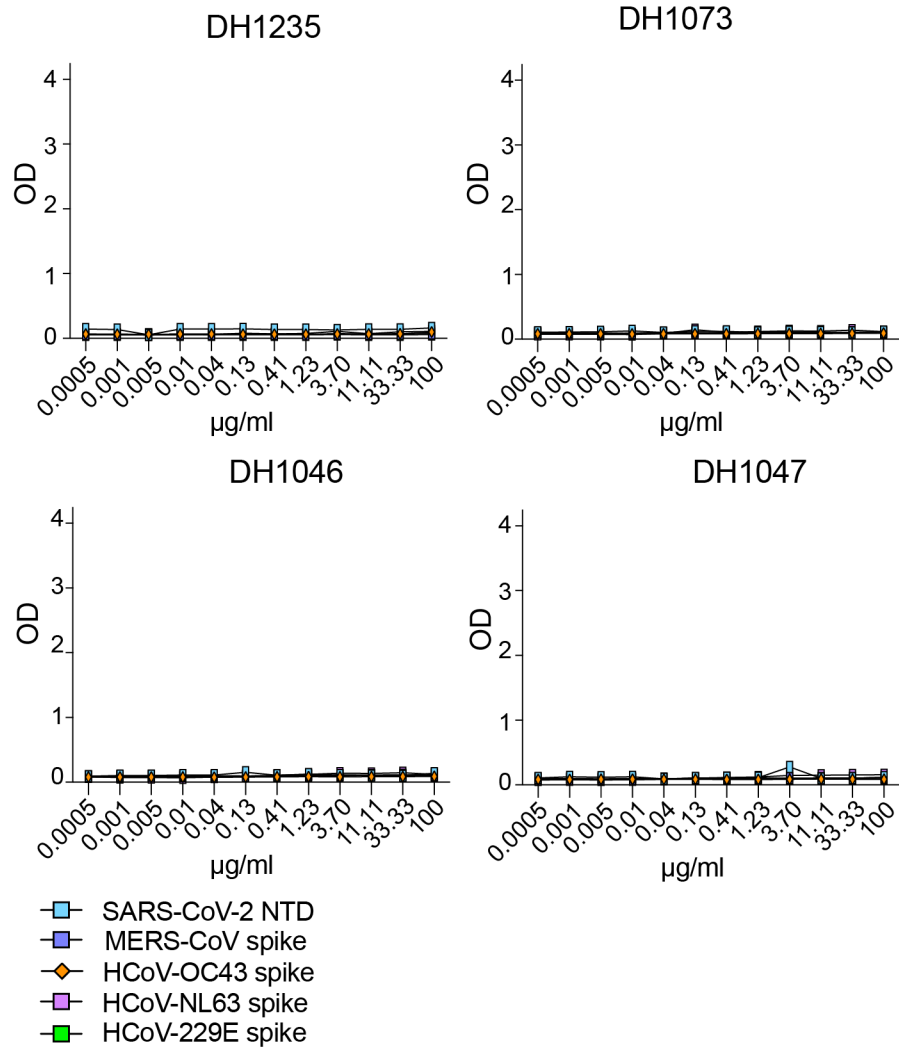



Figure S3

A

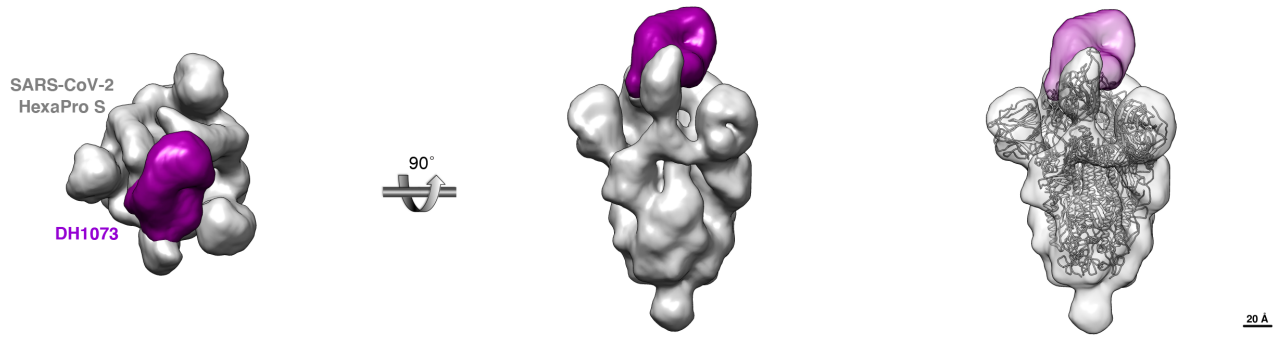

B

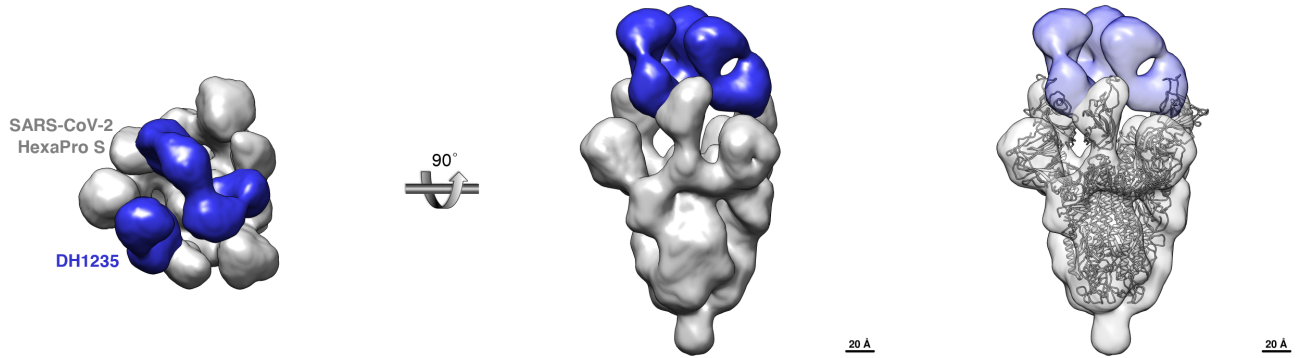

C

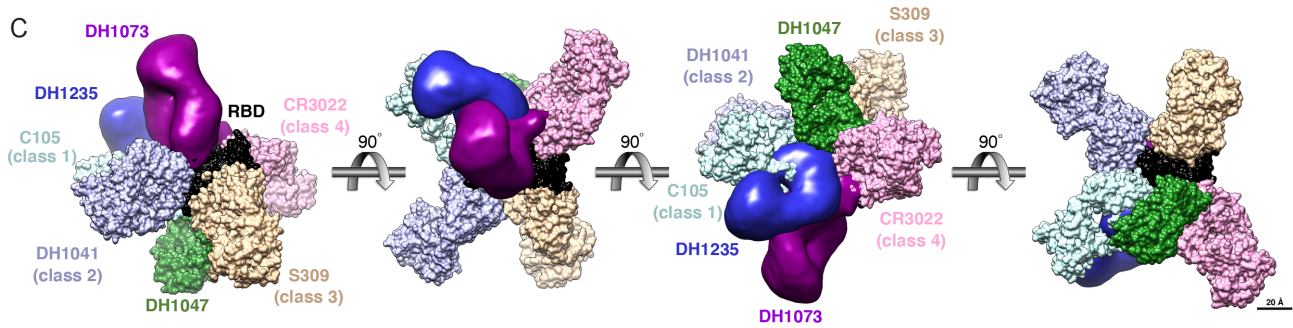

D

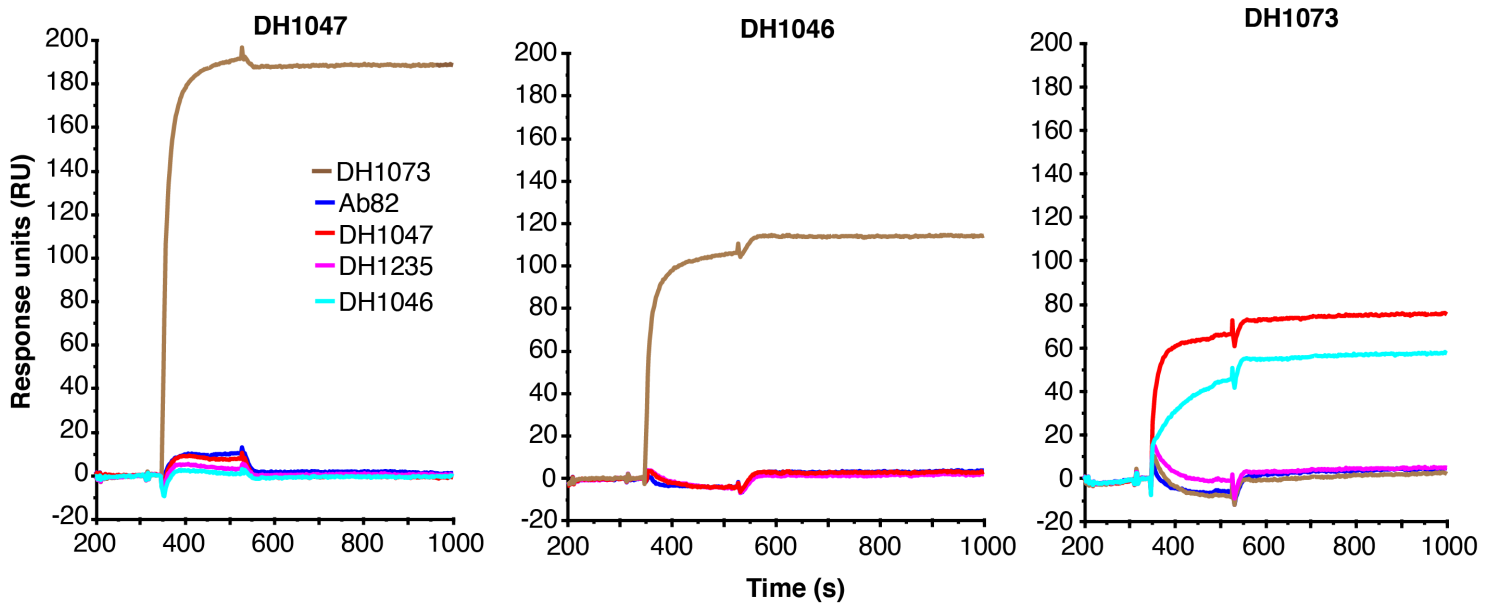

| mAb    | DH1046 | DH1047 | DH1073 | DH1235 |
|--------|--------|--------|--------|--------|
| DH1046 | +      | +      | -      | +      |
| DH1047 | +      | +      | -      | +      |
| DH1073 | -      | -      | +      | +      |

- no competition  
+ no competition

Figure S4

A

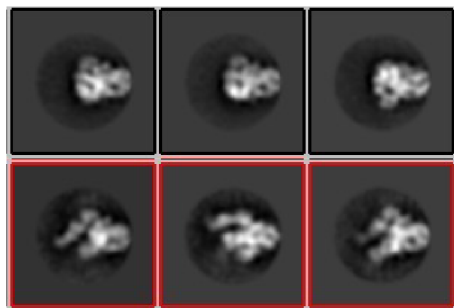

C

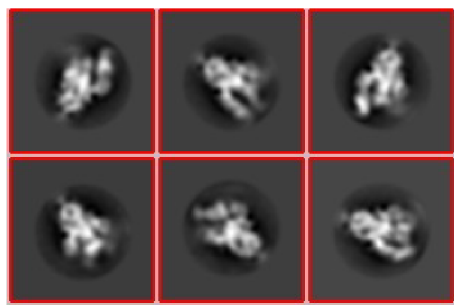

B

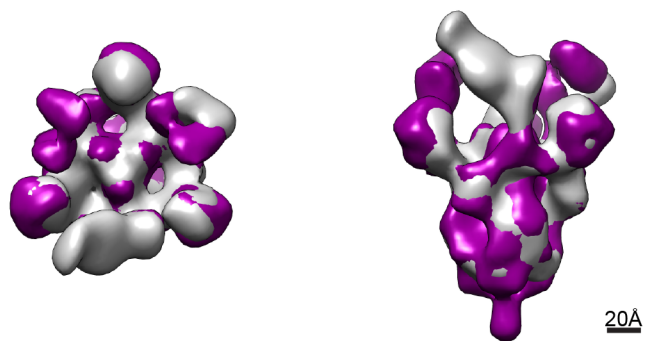

D

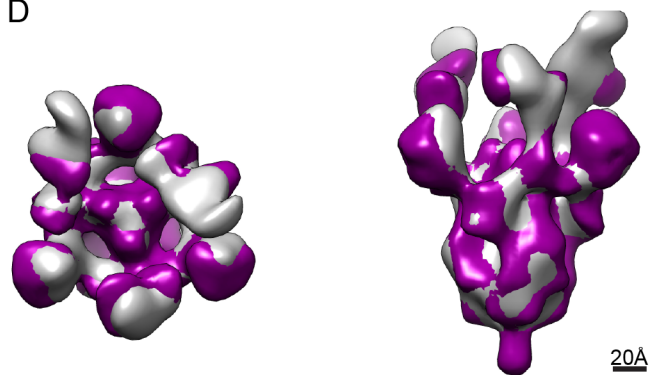

Figure S5

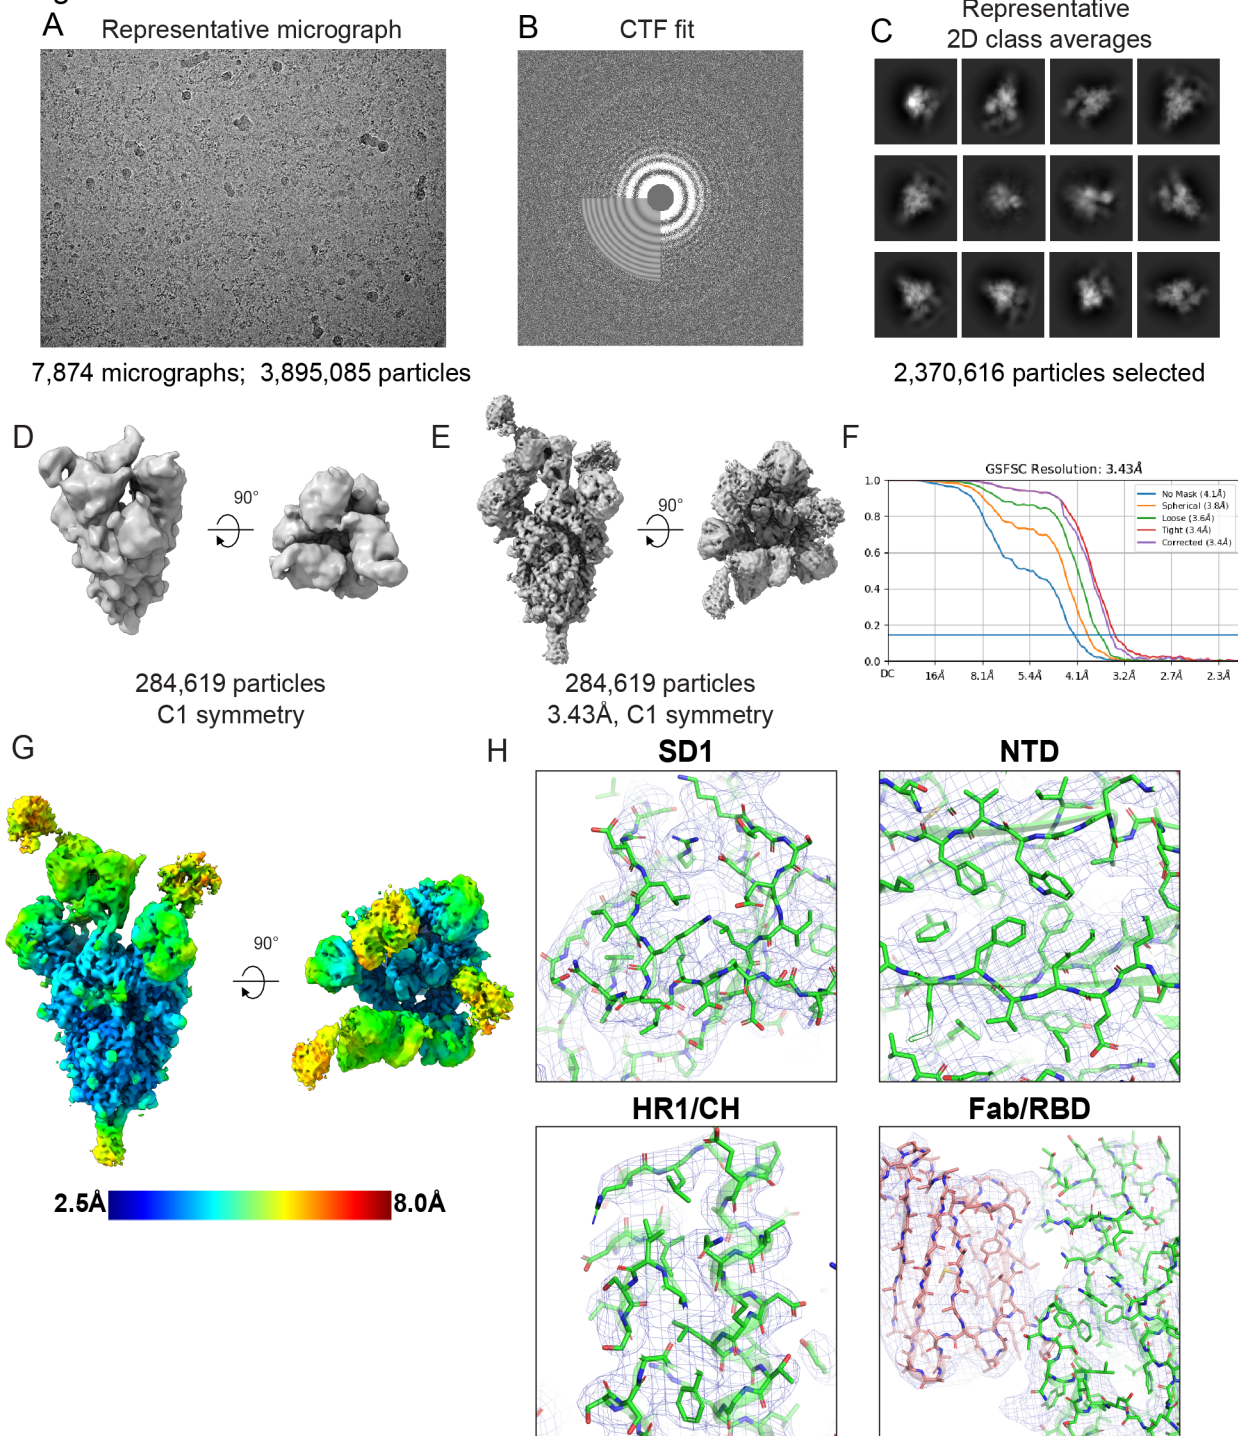

Figure S6

| SARS-CoV Toronto spike |           |          |        |
|------------------------|-----------|----------|--------|
| Fab                    | ka (1/Ms) | kd (1/s) | KD(nM) |
| DH1047                 | 9.622E+4  | <1.0E-5  | <0.1   |

| RsSCH014 spike |           |          |        |
|----------------|-----------|----------|--------|
| Fab            | ka (1/Ms) | kd (1/s) | KD(nM) |
| DH1047         | 8.602E+4  | <1.0E-5  | <0.1   |

DH1047 Fab vs. SARS-CoV Toronto

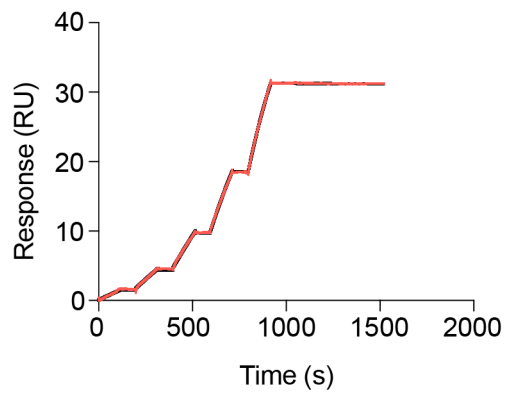

DH1047 Fab vs. RsSCH014

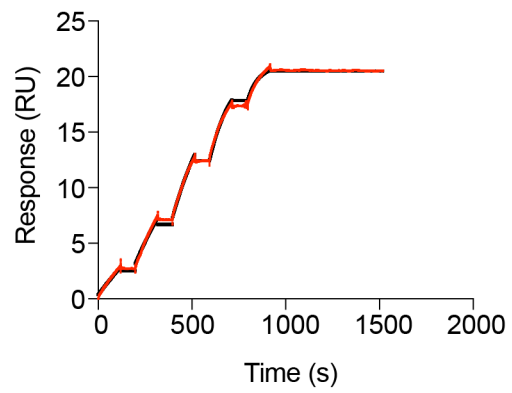

Figure S7

A CH65 control -12hr prophylaxis

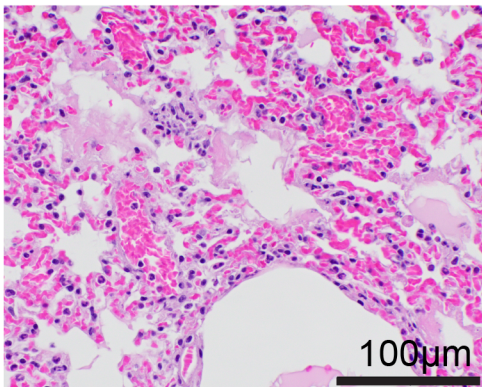

B CH65 +12hr therapy

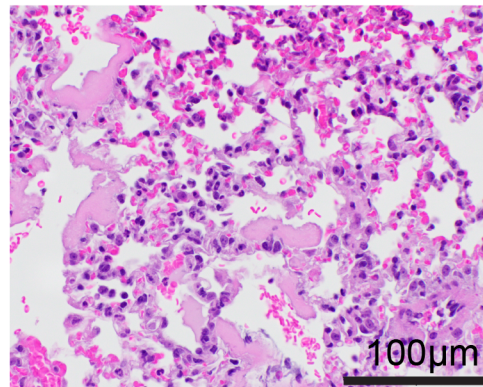

C DH1047 -12hr prophylaxis

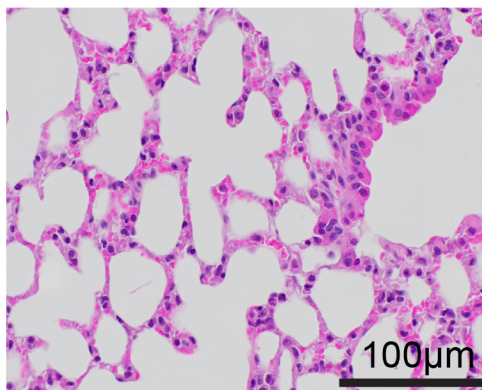

D DH1047 +12hr therapy

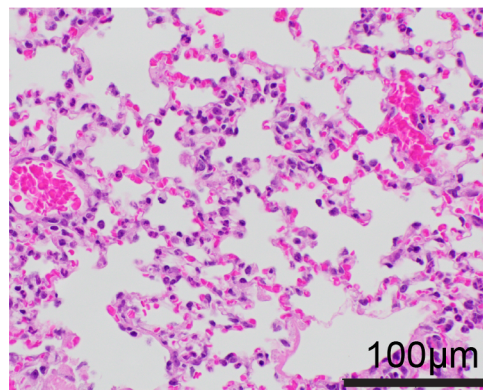

Figure S8

A

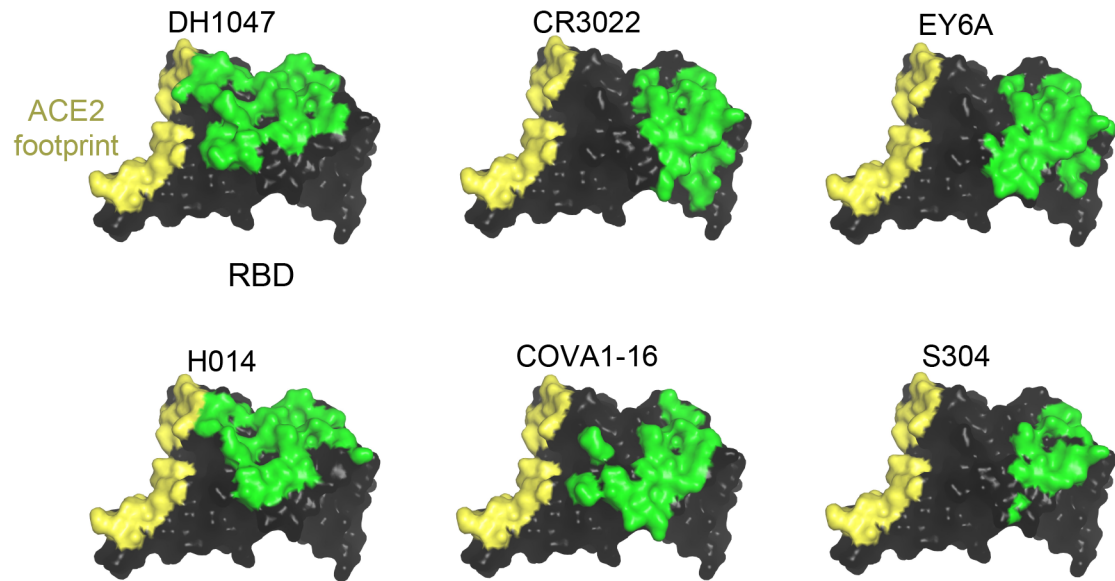

B

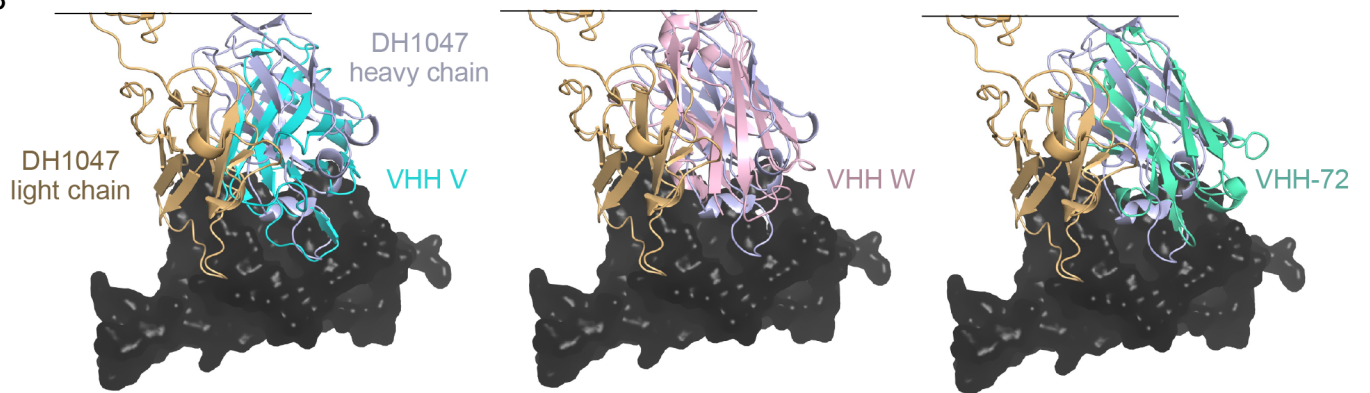

Figure S9

A

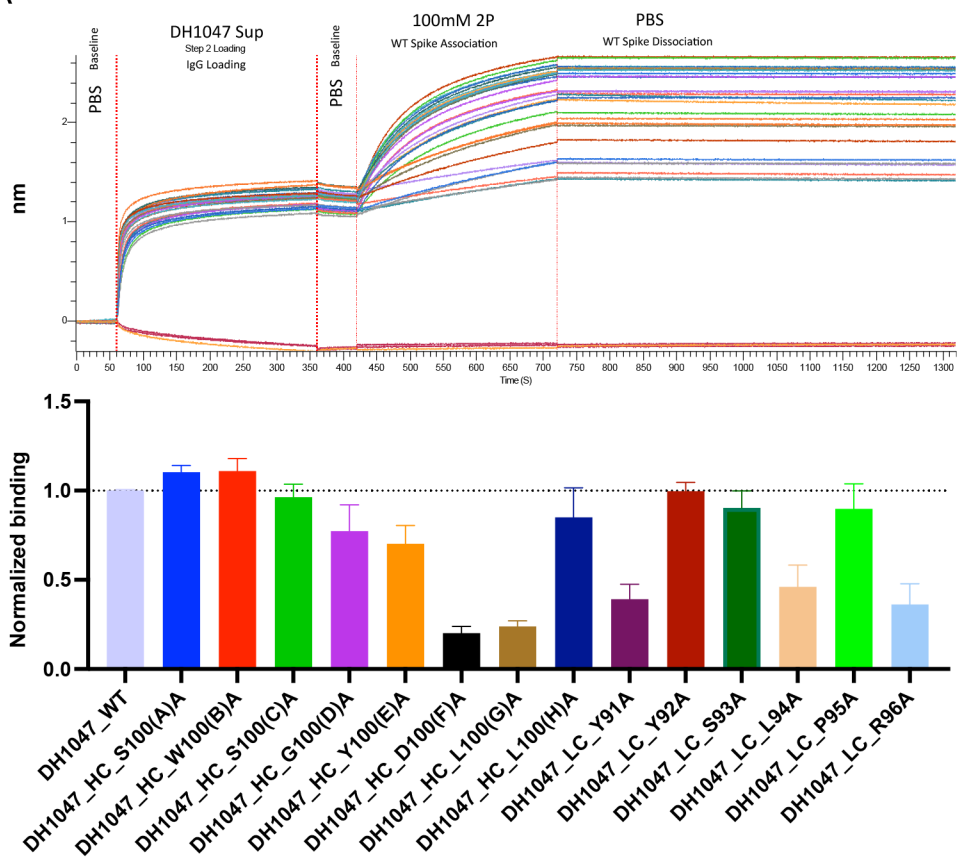

B

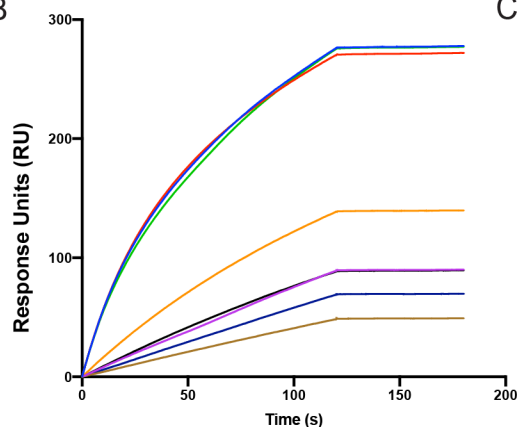

- DH1047 WT
- DH1047 HC S100(A)A
- DH1047 HC W100(B)A
- DH1047 HC D100(F)A
- DH1047 HC L100(G)A
- DH1047 LC Y91A
- DH1047 LC L94A
- DH1047 LC R96A

C

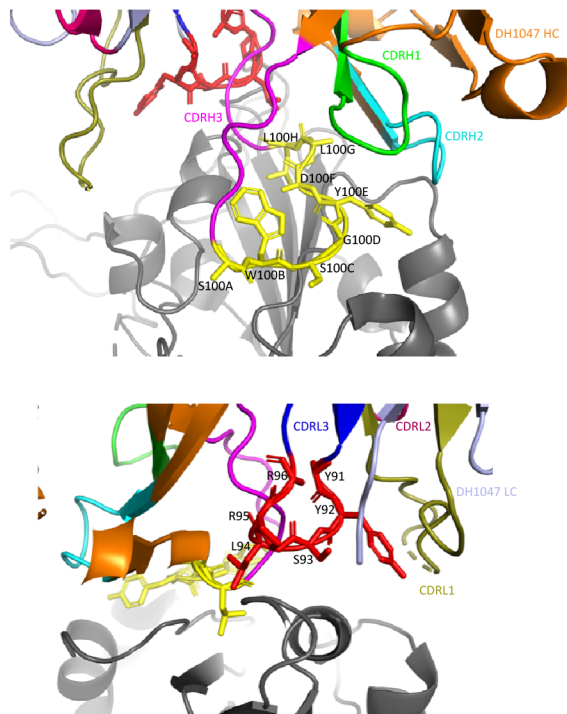

Figure S10

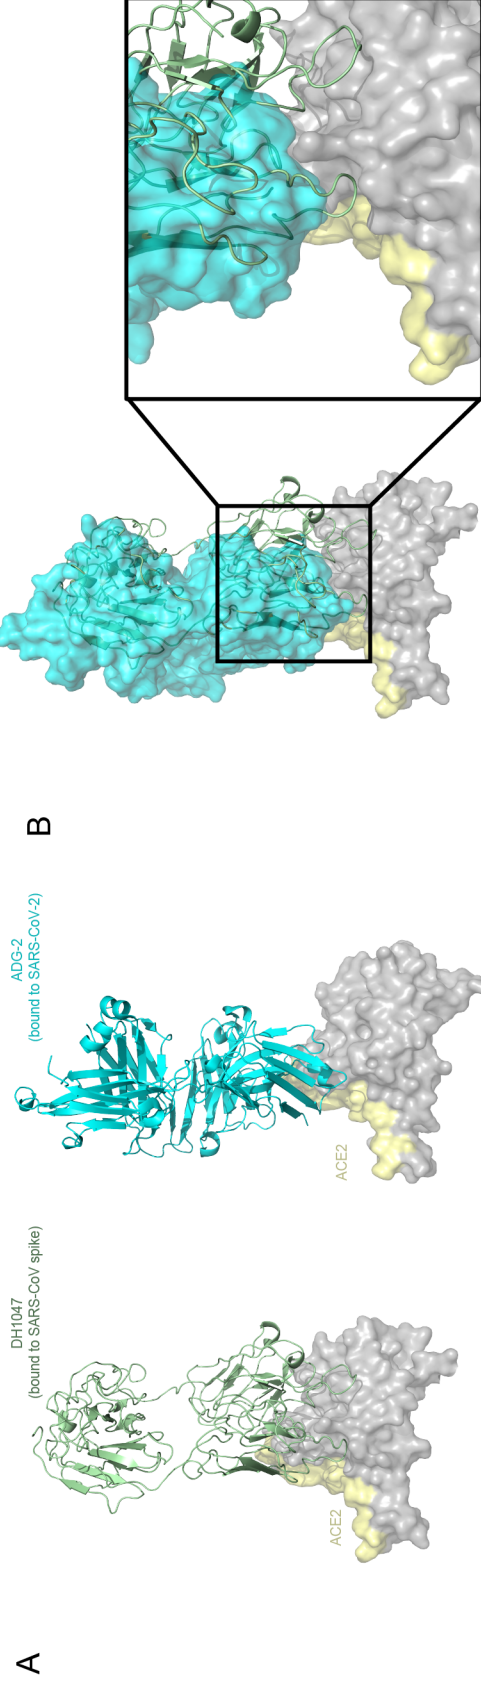

**C SARS-CoV-2 B.1.351**

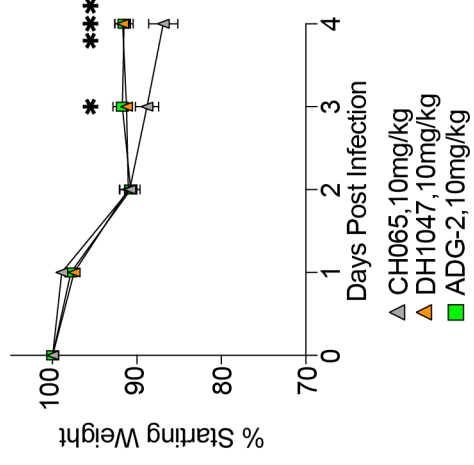

**SARS-CoV-2 B.1.351 Titer 4dpi**

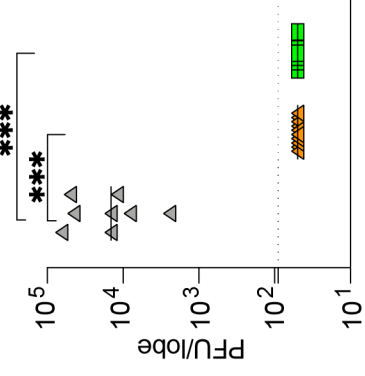

**Lung Discoloration 4dpi**

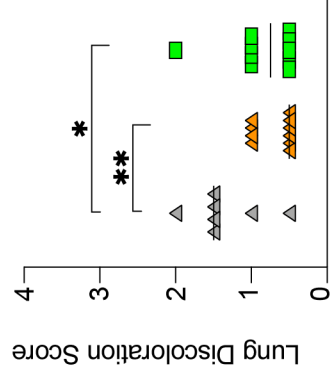



Table S1. Monoclonal antibody screen against SARS-CoV-2 2AA MA, SARS-CoV, WIV-1, and RsSHC014

| mAb # | DH #          | Specificity to SARS-CoV-2 | ELISA cross-reactivity                       | Live virus neutralization IC <sub>50</sub> (µg/ml) |               |               |               |
|-------|---------------|---------------------------|----------------------------------------------|----------------------------------------------------|---------------|---------------|---------------|
|       |               |                           |                                              | SARS-CoV-2 2AA MA                                  | SARS-CoV      | WIV-1         | RsSHC014      |
| 1     | DH1058        | S2                        | SARS-CoV-1, MERS-CoV, 229E, NL63, HKU1, OC43 | >10                                                | >10           | >10           | >10           |
| 2     | DH1057        | S2                        | SARS-CoV-1, OC43                             | >10                                                | >10           | >10           | >10           |
| 3     | <b>DH1047</b> | <b>RBD</b>                | <b>SARS-CoV, SARS-CoV-2, and bat CoVs</b>    | <b>0.3979</b>                                      | <b>0.0287</b> | <b>0.191</b>  | <b>0.2005</b> |
| 4     | DH1203        | RBD                       | SARS-CoV and SARS-CoV-2                      | 3.768                                              | 0.04781       | >10           | >10           |
| 5     | DH1127        | RBD                       | SARS-CoV and SARS-CoV-2                      | >10                                                | >10           | >10           | >10           |
| 6     | DH1059        | no binding                | SARS-CoV-2                                   | >10                                                | >10           | >10           | >10           |
| 7     | DH1081        | NTD                       | SARS-CoV and SARS-CoV-2                      | >10                                                | >10           | >10           | >10           |
| 8     | DH1085        | no binding                | SARS-CoV-2                                   | >10                                                | >10           | >10           | >10           |
| 9     | DH1080        | RBD                       | SARS-CoV and SARS-CoV-2                      | >10                                                | 0.0059        | 0.0330        | >10           |
| 10    | DH1061.1      | NTD                       | SARS-CoV and SARS-CoV-2                      | >10                                                | >10           | >10           | >10           |
| 11    | DH1065        | NTD                       | SARS-CoV and SARS-CoV-2                      | >10                                                | >10           | >10           | >10           |
| 12    | DH1066        | NTD                       | only SARS-CoV                                | >10                                                | >10           | >10           | >10           |
| 13    | DH1064        | RBD                       | SARS-CoV and SARS-CoV-2                      | >10                                                | 0.0216        | >10           | >10           |
| 14    | DH1067        | NTD                       | SARS-CoV and SARS-CoV-2                      | >10                                                | >10           | >10           | >10           |
| 15    | DH1069        | NTD                       | SARS-CoV and SARS-CoV-2                      | >10                                                | >10           | >10           | >10           |
| 16    | <b>DH1046</b> | <b>RBD</b>                | <b>SARS-CoV, SARS-CoV-2, and bat CoVs</b>    | <b>2.857</b>                                       | <b>0.1033</b> | <b>0.4248</b> | <b>1.274</b>  |
| 17    | DH1068        | NTD                       | SARS-CoV and SARS-CoV-2                      | >10                                                | >10           | >10           | >10           |
| 18    | DH1086        | NTD                       | SARS-CoV and SARS-CoV-2                      | >10                                                | >10           | >10           | >10           |
| 19    | DH1071        | NTD                       | SARS-CoV and SARS-CoV-2                      | >10                                                | >10           | >10           | >10           |
| 20    | DH1088        | no binding                | SARS-CoV-2                                   | >10                                                | >10           | >10           | >10           |
| 21    | <b>DH1073</b> | <b>RBD</b>                | <b>SARS-CoV, SARS-CoV-2, and bat CoVs</b>    | <b>0.8088</b>                                      | <b>0.0161</b> | <b>0.267</b>  | <b>&gt;10</b> |
| 22    | <b>DH1235</b> | <b>RBD</b>                | <b>SARS-CoV, SARS-CoV-2, and bat CoVs</b>    | <b>0.1226</b>                                      | <b>0.0403</b> | <b>0.0602</b> | <b>&gt;10</b> |
| 23    | DH1306        | RBD                       | SARS-CoV and SARS-CoV-2                      | >10                                                | >10           | >10           | >10           |
| 24    | DH1193        | RBD                       | SARS-CoV and SARS-CoV-2                      | 4.345                                              | >10           | >10           | >10           |
| 25    | DH1152        | RBD                       | SARS-CoV and SARS-CoV-2                      | >10                                                | >10           | >10           | >10           |
| 26    | DH1171        | NTD                       | SARS-CoV and SARS-CoV-2                      | >10                                                | >10           | >10           | >10           |
| 27    | DH1109        | RBD                       | SARS-CoV and SARS-CoV-2                      | >10                                                | >10           | >10           | >10           |
| 28    | DH1208        | RBD                       | SARS-CoV and SARS-CoV-2                      | >10                                                | >10           | >10           | >10           |
| 29    | DH1166        | RBD                       | SARS-CoV and SARS-CoV-2                      | >10                                                | >10           | >10           | >10           |
| 30    | DH1191        | RBD                       | SARS-CoV and SARS-CoV-2                      | >10                                                | >10           | >10           | >10           |
| 31    | DH1120        | RBD                       | SARS-CoV and SARS-CoV-2                      | >10                                                | >10           | >10           | >10           |
| 32    | DH1110        | NTD                       | SARS-CoV and SARS-CoV-2                      | >10                                                | >10           | >10           | >10           |
| 33    | DH1106        | NTD                       | SARS-CoV and SARS-CoV-2                      | >10                                                | >10           | >10           | >10           |
| 34    | DH1112        | RBD                       | SARS-CoV and SARS-CoV-2                      | >10                                                | 0.0023        | 0.1617        | >10           |
| 35    | DH1117        | RBD                       | SARS-CoV and SARS-CoV-2                      | >10                                                | >10           | >10           | >10           |
| 36    | DH1115        | RBD                       | SARS-CoV and SARS-CoV-2                      | >10                                                | 0.0083        | 0.1614        | >10           |
| 37    | DH1093        | NTD                       | SARS-CoV and SARS-CoV-2                      | >10                                                | >10           | >10           | >10           |
| 38    | DH1095        | RBD                       | SARS-CoV                                     | >10                                                | >10           | >10           | >10           |
| 39    | DH1113        | RBD                       | SARS-CoV and SARS-CoV-2                      | >10                                                | >10           | >10           | >10           |
| 40    | DH1114        | NTD                       | SARS-CoV and SARS-CoV-2                      | >10                                                | >10           | >10           | >10           |
| 41    | DH1098        | RBD                       | SARS-CoV and SARS-CoV-2                      | >10                                                | 0.0052        | 0.0318        | >10           |
| 42    | DH1101        | RBD                       | SARS-CoV and SARS-CoV-2                      | >10                                                | 0.0012        | >10           | >10           |
| 43    | DH1298        | RBD                       | SARS-CoV and SARS-CoV-2                      | >10                                                | 0.0399        | 0.4312        | >10           |
| 44    | DH1299        | RBD                       | SARS-CoV and SARS-CoV-2                      | >10                                                | >10           | >10           | >10           |
| 45    | DH1300        | RBD                       | SARS-CoV and SARS-CoV-2                      | >10                                                | >10           | >10           | >10           |
| 46    | DH1301        | RBD                       | SARS-CoV and SARS-CoV-2                      | >10                                                | >10           | >10           | >10           |
| 47    | DH1302        | RBD                       | SARS-CoV and SARS-CoV-2                      | >10                                                | >10           | >10           | >10           |
| 48    | DH1303        | RBD                       | SARS-CoV and SARS-CoV-2                      | >10                                                | >10           | >10           | >10           |
| 49    | DH1304        | RBD                       | SARS-CoV and SARS-CoV-2                      | >10                                                | >10           | >10           | >10           |
| 50    | DH1305        | RBD                       | SARS-CoV and SARS-CoV-2                      | 9.877                                              | >10           | >10           | >10           |

---

PDB ID 7SG4

EMDB ID EMD-25105

---

**Data collection and processing**

|                                        |                 |
|----------------------------------------|-----------------|
| Microscope                             | FEI Titan Krios |
| Detector                               | Gatan K3        |
| Magnification                          | 81,000          |
| Voltage (kV)                           | 300             |
| Electron exposure (e-/Å <sup>2</sup> ) | 54.1            |
| Defocus range (µm)                     | ~0.75-2.50      |
| Pixel size (Å)                         | 1.08            |
| Reconstruction software                | cryoSparc       |
| Symmetry imposed                       | C1              |
| Initial particle images (no.)          | 2,370,616       |
| Final particle images (no.)            | 284,619         |
| Map resolution (Å)                     | 3.43            |
| FSC threshold                          | 0.143           |

**Refinement**

|                      |       |
|----------------------|-------|
| Initial model used   | 7LD1  |
| Model resolution (Å) | 3.43  |
| FSC threshold        | 0.143 |

**Model composition**

|                   |        |
|-------------------|--------|
| Nonhydrogen atoms | 28,712 |
| Protein residues  | 3,737  |

**R.m.s. deviations**

|                  |       |
|------------------|-------|
| Bond lengths (Å) | 0.013 |
| Bond angles (°)  | 1.906 |

**Validation**

|                   |      |
|-------------------|------|
| MolProbity score  | 1.C9 |
| Clashscore        | 0.2  |
| Poor rotamers (%) | 2.01 |
| EM ringer score   | 2.83 |

**Ramachandran plot**

|                |       |
|----------------|-------|
| Favored (%)    | 88.89 |
| Allowed (%)    | 9.53  |
| Disallowed (%) | 1.58  |

---

Table S3. Immunogenetic characteristics of broadly cross-reactive mAbs

| DH#    | Antibody ID | Binding Specificity | Cross Reactivity                                       | Antibody Gene Analysis  |            |              |                      |          |         |              |                      |          |         |
|--------|-------------|---------------------|--------------------------------------------------------|-------------------------|------------|--------------|----------------------|----------|---------|--------------|----------------------|----------|---------|
|        |             |                     |                                                        | Donor ID                | Time Point | HCDR3 Length | Heavy chain mutation | VH_Gene  | JH_Gene | LCDR3 Length | Light chain mutation | VL_Gene  | JL_Gene |
| DH1235 | Ab026319_LS | RBD                 | SARS-CoV-1                                             | SARS-CoV-2 convalescent | Day 36     | 21           | 1.68                 | IGHV3-48 | IGHJ4   | 9            | 1.75                 | IGLV4-60 | IGLJ2   |
| DH1073 | Ab026258_LS | RBD                 | SARS-CoV-1                                             | SARS-CoV convalescent   | Year 17    | 15           | 9.06                 | IGHV1-46 | IGHJ6   | 11           | 2.92                 | IGKV3-11 | IGKJ1   |
| DH1046 | Ab026204_LS | RBD                 | SARS-CoV, PCoV GXP4L, Bat CoV RsSHC014, Bat CoV RaTG13 | SARS-CoV convalescent   | Year 17    | 24           | 4.70                 | IGHV3-23 | IGHJ6   | 9            | 3.65                 | IGKV1-5  | IGKJ2   |
| DH1047 | Ab712384_LS | RBD                 | SARS-CoV, PCoV GXP4L, Bat CoV RsSHC014, Bat CoV RaTG13 | SARS-CoV convalescent   | Year 17    | 24           | 8.05                 | IGHV1-46 | IGHJ4   | 9            | 2.05                 | IGKV4-1  | IGKJ1   |
